# Supplementary material
Source: MDPI journal article supplement (https://www.mdpi.com/2311-5629/6/4/62)
Supplement: s1 [file s1]

# Facile Method to Prepare pH-Sensitive PEI-Functionalized Carbon Nanotubes As Rationally Designed Vehicles For NSAIDs Delivery

Vassilis Tangoulis <sup>1,\*</sup>, Nikolia Lalioti <sup>1</sup>, John Parthenios <sup>2</sup>, Nathan Langford <sup>3</sup>, Eugenia Valsami-Jones <sup>3</sup>, Chrisoula Kakoulidou <sup>4</sup>, Giorgos Psomas <sup>4</sup> and Vlasoula Bekiari <sup>5</sup>

<sup>1</sup> Department of Chemistry, University of Patras, GR-26504 Patras, Greece; Email: vtango@upatras.gr

<sup>2</sup> Foundation for Research and Technology, Hellas (FORTH), Institute of Chemical Engineering Sciences (ICE/HT), P.O. Box 1414 GR - 26504 Patras Greece

<sup>3</sup> School of Geography, Earth and Environmental Sciences, University of Birmingham, Edgbaston, Birmingham, UK.

<sup>4</sup> Department of General and Inorganic Chemistry, Faculty of Chemistry, Aristotle University of Thessaloniki, P.O. Box 135, GR-54124 Thessaloniki, Greece.

<sup>5</sup> Department of Crop Science, University of Patras, 30200 Messolonghi, Greece.

## Supplementary Information

|                                     |   |
|-------------------------------------|---|
| S1. IR spectra                      | 2 |
| S2. Interaction with serum albumins | 3 |
| S3. Interaction with CT DNA         | 5 |
| S4. Competitive studies with EB     | 6 |
| S5. References                      | 7 |

## FIGURES

|                                                                                                                                                                                                                                                                                                          |   |
|----------------------------------------------------------------------------------------------------------------------------------------------------------------------------------------------------------------------------------------------------------------------------------------------------------|---|
| <b>Figure S1.</b> IR spectra of the a) carboxylated MWCNTs b) The PEI-functionalized MWCNTs and c) the final hybrid material MWCNTS@PEI@NAP (NL004) .                                                                                                                                                    | 2 |
| <b>Figure S2.</b> Plot of relative BSA fluorescence emission intensity at $\lambda_{em} = 343$ nm ( $I/I_o$ , %) <i>versus</i> $r$ ( $r = [NL004]/[BSA]$ ) (up to 70.9% of the initial BSA fluorescence) in buffer solution (150 mM NaCl and 15 mM trisodium citrate at pH 7.0) in the presence of NL004 | 4 |
| <b>Figure S3.</b> Stern-Volmer quenching plot of BSA for NL004.                                                                                                                                                                                                                                          | 4 |
| <b>Figure S4.</b> Scatchard plot of BSA for NL004.                                                                                                                                                                                                                                                       | 4 |
| <b>Figure S5.</b> Plot of $[DNA]/(\epsilon_A - \epsilon_t)$ <i>versus</i> $[DNA]$ for NL004.                                                                                                                                                                                                             | 5 |
| <b>Figure S6.</b> Plot of relative EB-DNA fluorescence emission intensity ( $I/I_o$ , %) at $\lambda_{em} = 592$ nm <i>versus</i> $r$ ( $r = [NL004]/[DNA]$ ) in buffer solution (150 mM NaCl and 15 mM trisodium citrate at pH 7.0) in the presence of NL004.                                           | 6 |
| <b>Figure S7.</b> Stern-Volmer quenching plot of EB-DNA fluorescence for NL004.                                                                                                                                                                                                                          | 6 |

## S1. IR spectra

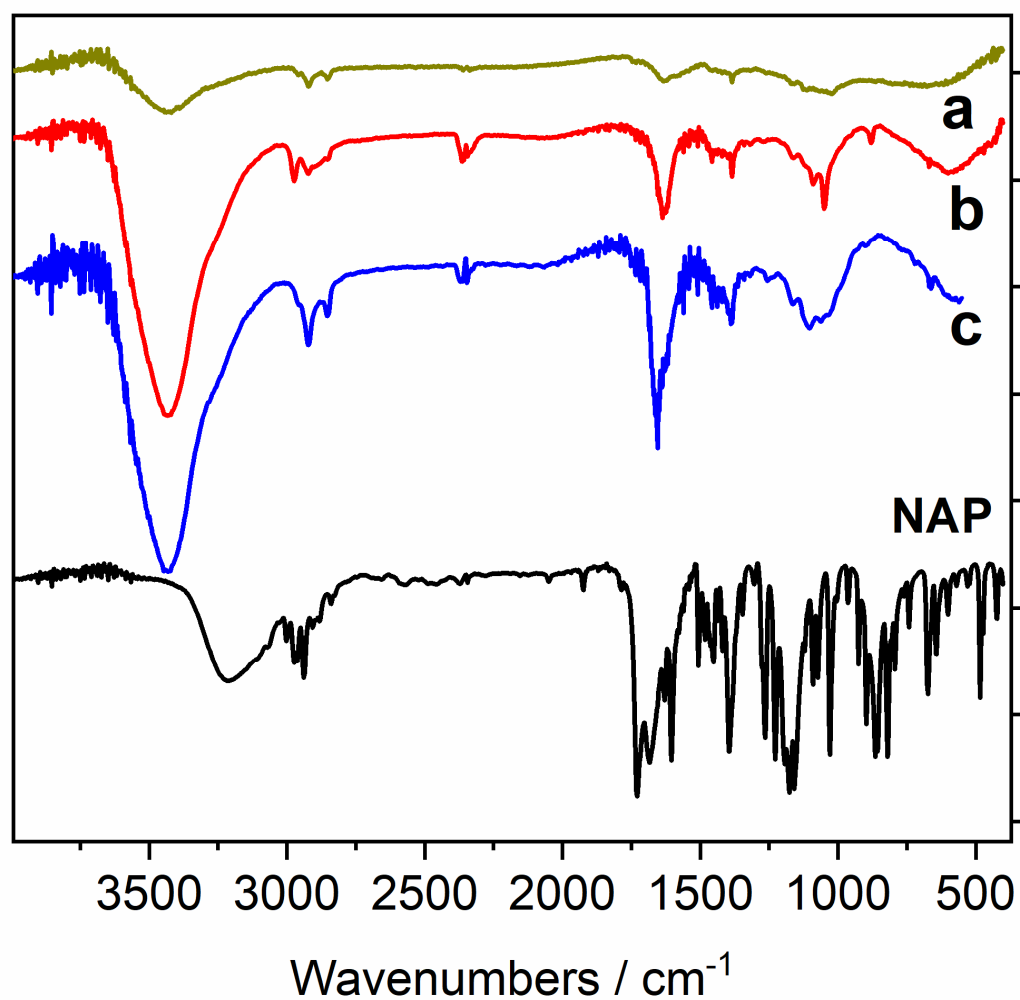

**Figure S1.** IR spectra of the a) carboxylated MWCNTs (NL002) b) The PEI-functionalized MWCNTS (NL003) and c) the final hybrid material MWCNTS@PEI@NAP (NL004); and the NAP (NAPROXEN) drug.

## S2. Interaction with serum albumins

The extent of the inner-filter effect can be roughly estimated with the following formula:

$$I_{\text{corr}} = I_{\text{meas}} \times 10^{\frac{\varepsilon(\lambda_{\text{exc}})cd}{2}} \times 10^{\frac{\varepsilon(\lambda_{\text{em}})cd}{2}} \quad (\text{eq. S1})$$

where  $I_{\text{corr}}$  = corrected intensity,  $I_{\text{meas}}$  = the measured intensity,  $c$  = the concentration of the quencher (i.e. compound under study),  $d$  = the cuvette (1 cm),  $\varepsilon(\lambda_{\text{exc}})$  and  $\varepsilon(\lambda_{\text{em}})$  = the  $\varepsilon$  of the quencher at the excitation and the emission wavelength, respectively, as calculated from the UV-vis spectra of the quencher [1].

The Stern-Volmer and Scatchard graphs are used in order to study the interaction of a quencher with serum albumins. According to Stern-Volmer quenching equation [2]:

$$\frac{I_0}{I} = 1 + k_q \tau_0 [Q] = 1 + K_{\text{SV}} [Q] \quad (\text{eq. S2})$$

where  $I_0$  = the initial tryptophan fluorescence intensity of SA,  $I$  = the tryptophan fluorescence intensity of SA after the addition of the quencher (i.e. compound under study),  $k_q$  = the quenching constant,  $K_{\text{SV}}$  = the Stern-Volmer constant,  $\tau_0$  = the average lifetime of SA without the quencher,  $[Q]$  = the concentration of the quencher.  $K_{\text{SV}}$  ( $\text{M}^{-1}$ ) is obtained by the slope of the diagram  $I_0/I$  versus  $[Q]$ , and the quenching constant ( $k_q$ ,  $\text{M}^{-1}\text{s}^{-1}$ ) is calculated from eq. S3, with  $\tau_0 = 10^{-8}$  s as fluorescence lifetime of tryptophan in SA:

$$K_{\text{SV}} = k_q \tau_0 \quad (\text{eq. S3})$$

From the Scatchard equation [3]:

$$\frac{\Delta I / I_0}{[Q]} = nK - K \frac{\Delta I}{I_0} \quad (\text{eq. S4})$$

where  $n$  is the number of binding sites per albumin and  $K$  is the SA-binding constant,  $K$  (in  $\text{M}^{-1}$ ) is calculated from the slope in plot  $(\Delta I / I_0) / [Q]$  versus  $\Delta I / I_0$  and  $n$  is given by the ratio of y intercept to the slope [3].

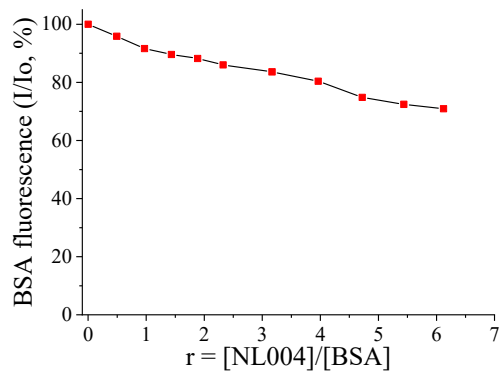

**Figure S2.** Plot of relative BSA fluorescence emission intensity at  $\lambda_{\text{em}} = 343 \text{ nm}$  ( $I/I_0$ , %) *versus*  $r$  ( $r = [\text{NL004}]/[\text{BSA}]$ ) (up to 70.9% of the initial BSA fluorescence) in buffer solution (150 mM NaCl and 15 mM trisodium citrate at pH 7.0) in the presence of NL004.

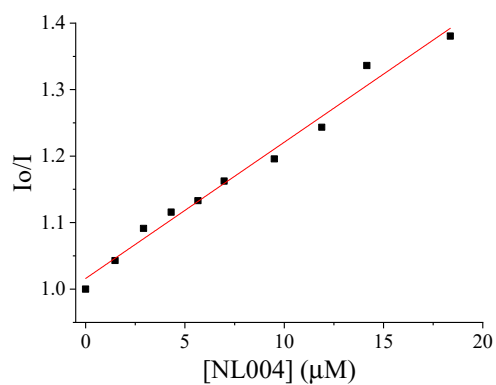

**Figure S3.** Stern-Volmer quenching plot of BSA for NL004.

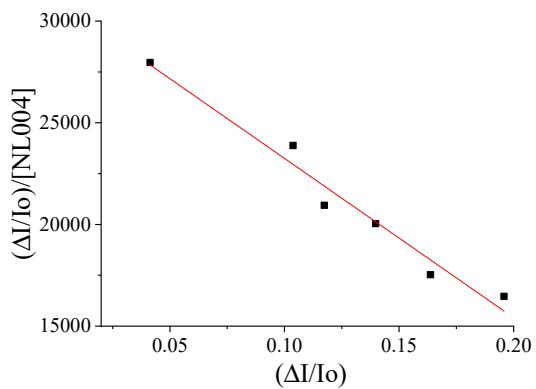

**Figure S4.** Scatchard plot of BSA for NL004.

### S3. Interaction with CT DNA

The DNA-binding constant ( $K_b$  in  $M^{-1}$ ) can be obtained by monitoring the changes in the absorbance at the corresponding  $\lambda_{max}$  with increasing concentrations of CT DNA and it is given by the ratio of slope to the y intercept in plots  $[DNA]/(\epsilon_A - \epsilon_f)$  versus  $[DNA]$ , according to the Wolfe-Shimer equation [4]:

$$\frac{[DNA]}{(\epsilon_A - \epsilon_f)} = \frac{[DNA]}{(\epsilon_b - \epsilon_f)} + \frac{1}{K_b(\epsilon_b - \epsilon_f)} \quad (\text{eq. S5})$$

where  $[DNA]$  is the concentration of DNA in base pairs,  $\epsilon_A = A_{obsd}/[NL004]$ ,  $\epsilon_f$  = the extinction coefficient for the free compound and  $\epsilon_b$  = the extinction coefficient for the compound in the fully bound form.

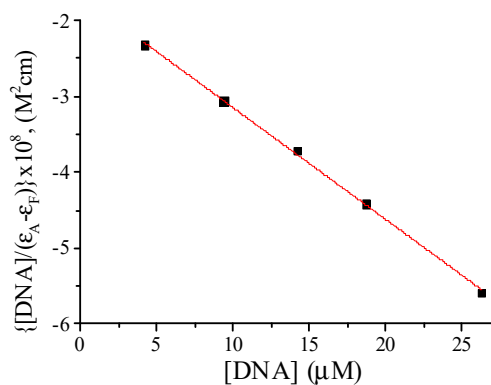

**Figure S5.** Plot of  $[DNA]/(\epsilon_A - \epsilon_f)$  versus  $[DNA]$  for NL004.

#### S4. Competitive studies with EB

The Stern-Volmer constant ( $K_{SV}$ , in  $M^{-1}$ ) is used to evaluate the quenching efficiency for the compound under study according to the Stern-Volmer equation (eq. S2) [2], where  $I_0$  and  $I$  are the emission intensities of the EB-DNA solution in the absence and the presence of the quencher, respectively,  $[Q]$  is the concentration of the quencher (i.e. compound under study),  $\tau_0$  = the average lifetime of the emitting system without the quencher and  $k_q$  = the quenching constant.  $K_{SV}$  is obtained from the Stern-Volmer plot by the slope of the diagram  $I_0/I$  versus  $[Q]$ . Taking  $\tau_0 = 23$  ns as the fluorescence lifetime of the EB-DNA system [5], the quenching constants ( $k_q$ , in  $M^{-1}s^{-1}$ ) of the compound can be determined according to eq. S3.

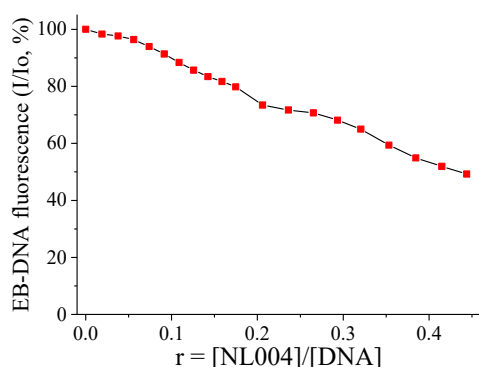

**Figure S6.** Plot of relative EB-DNA fluorescence emission intensity ( $I/I_0$ , %) at  $\lambda_{em} = 592$  nm *versus*  $r$  ( $r = [NL004]/[DNA]$ ) in buffer solution (150 mM NaCl and 15 mM trisodium citrate at pH 7.0) in the presence of NL004.

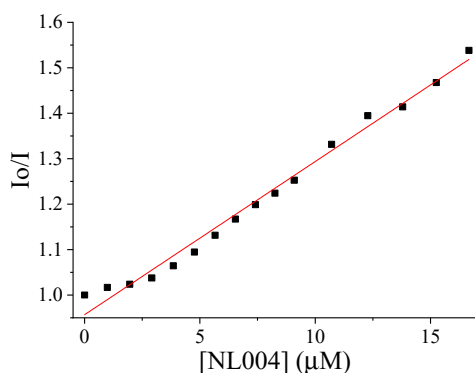

**Figure S7.** Stern-Volmer quenching plot of EB-DNA fluorescence for NL004.

## S5. References

- 1 Stella, L.; Capodilupo, A.L.; Bietti, M. A reassessment of the association between azulene and [60]fullerene. Possible pitfalls in the determination of binding constants through fluorescence spectroscopy. *Chem. Commun.*, **2008**, 4744-4746.
- 2 Lakowicz, J.R. *Principles of Fluorescence Spectroscopy*, third ed., Plenum Press, New York, 2006.
- 3 Wang, Y.; Zhang, H.; Zhang, G.; Tao, W. ; Tang, S. Interaction of the flavonoid hesperidin with bovine serum albumin: A fluorescence quenching study. *J. Luminescence* , **2007**, 126, 211-218.
- 4 Wolfe, A.; Shimer, G.; Meehan, T. Polycyclic aromatic hydrocarbons physically intercalate into duplex regions of denatured DNA. *Biochemistry*, **1987**, 26 , 6392-6396.
- 5 Heller, D.P.; Greenstock, C.L. Fluorescence lifetime analysis of DNA intercalated ethidium bromide and quenching by free dye. *Biophys. Chem.*, **1994**, 50, 305-312.
